# Supplementary material for: Magnesium Hydride-Mediated Sustainable Hydrogen Supply Prolongs the Vase Life of Cut Carnation Flowers via Hydrogen Sulfide
Source: PubMed Central journal article supplement (PMC7755932; doi:10.3389/fpls.2020.595376), 2020-12-09
Supplement: Data_Sheet_1.pdf [file Data_Sheet_1.pdf]

## SUPPLEMENTARY MATERIAL

### Title:

## Magnesium Hydride-Mediated Sustainable Hydrogen Supply Prolongs the Vase Life of Cut Carnation Flowers via Hydrogen Sulfide

*Longna Li*<sup>1</sup>, *Yuhao Liu*<sup>1</sup>, *Shu Wang*<sup>1</sup>, *Jianxin Zou*<sup>2</sup>, *Wenjiang Ding*<sup>2</sup> and *Wenbiao Shen*<sup>1,2\*</sup>

\*Correspondence: Wenbiao Shen

E-mail: [wbsenh@njau.edu.cn](mailto:wbsenh@njau.edu.cn)

**TABLE S1** Primer sequences used for detecting senescence-associated genes (*SAGs*) by qPCR

| Gene           | Accession number | Primer sequence (5'-3')        |
|----------------|------------------|--------------------------------|
| <i>DcGSTI</i>  | L05915           | Forward: AGATCATAGCATCAATCACGG |
|                |                  | Reverse: CGACAAGAATACTTCACGTCG |
| <i>DcbGal</i>  | CF259486         | Forward: AGCTTTAGATTTGGGCAGCA  |
|                |                  | Reverse: AGTAGATTTCCACGCGGTTG  |
| <i>DcActin</i> | AY007315         | Forward: GCACGGTATCGTCACCAACT  |
|                |                  | Reverse: AGCCTTTGGGTTAAGAGGCG  |

**FIGURE S1**

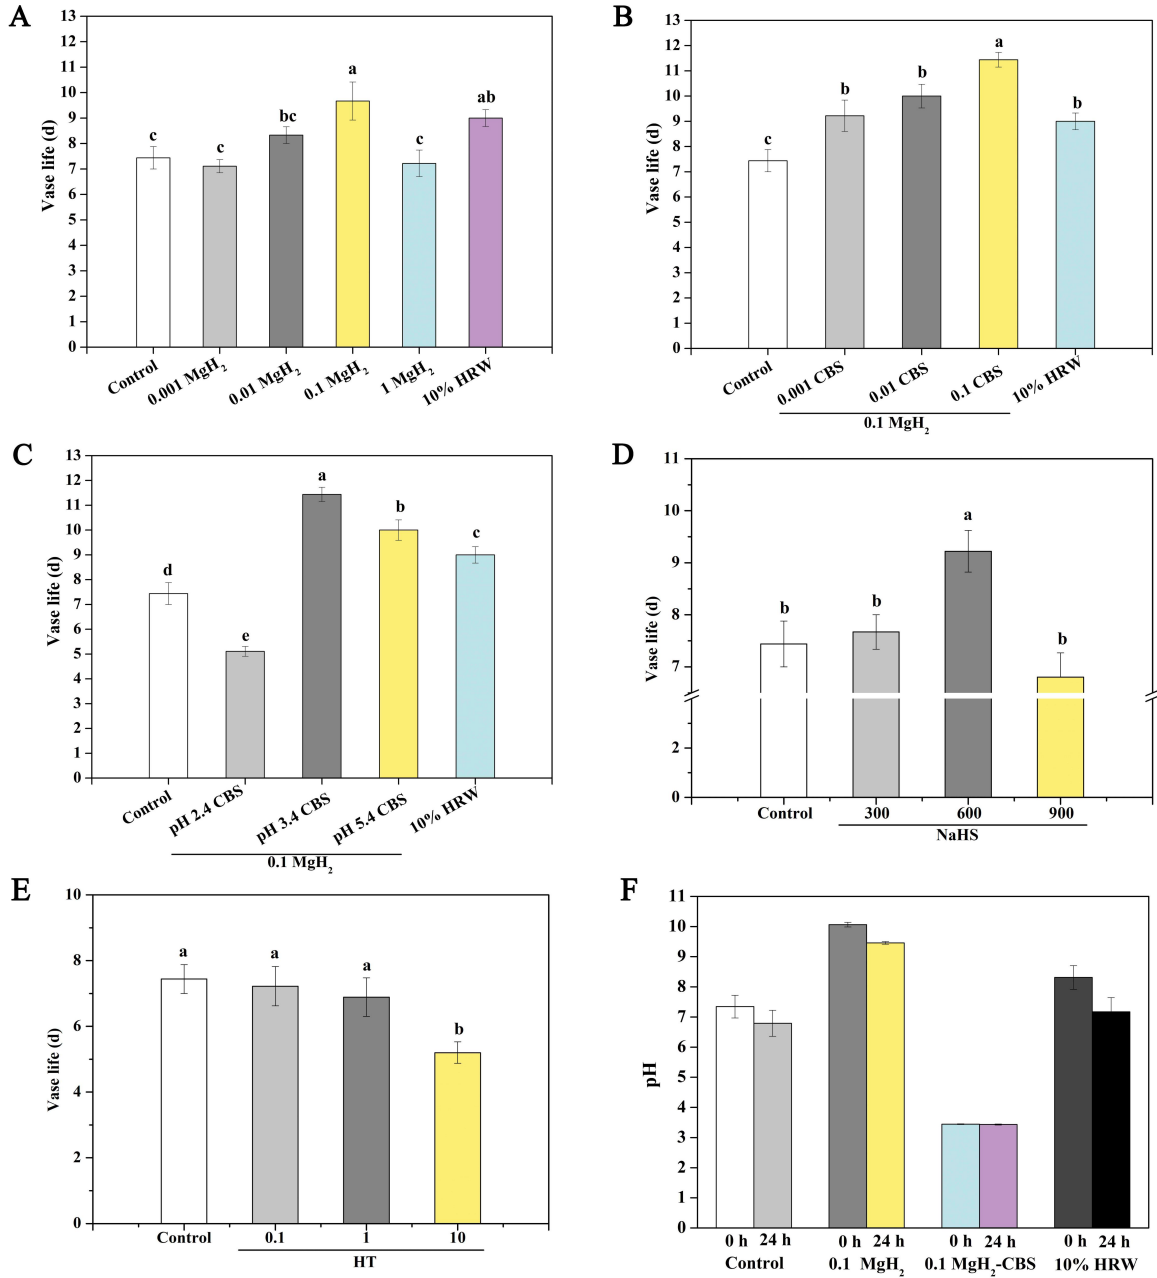

**FIGURE S1** Changes in vase life of cut carnations and pH. The cut flower stems were incubated in untreated (control) and treatment solutions containing 0.001, 0.01, 0.1, and 1 g L<sup>-1</sup> MgH<sub>2</sub>, 10% HRW, 0.001, 0.01, and 0.1 M citrate buffer solution (CBS, pH 3.4) plus 0.1 g L<sup>-1</sup> MgH<sub>2</sub>, 0.1 M CBS at pH 2.4, 3.4, and 5.4 plus 0.1 g L<sup>-1</sup> MgH<sub>2</sub>, 300, 600, and 900 μM NaHS, 0.1, 1, 10 mM hypotaurine (HT) during vase period. Afterwards, vase life (A-E) and pH (F) in solutions were

recorded. Values are mean  $\pm$  SE of three independent experiments with three replicated for each. Bars with different letters are significantly different ( $P < 0.05$ ), as determined by Duncan's multiple range test.
